# Supplementary material for: Targeting the COMMD4–H2B protein complex in lung cancer
Source: PubMed Central journal article supplement (PMC10703884; doi:10.1038/s41416-023-02476-8), 2023-11-01
Supplement: 41416_2023_2476_MOESM1_ESM.pdf [file 41416_2023_2476_MOESM1_ESM.pdf]

## Supplementary Figures and Legends

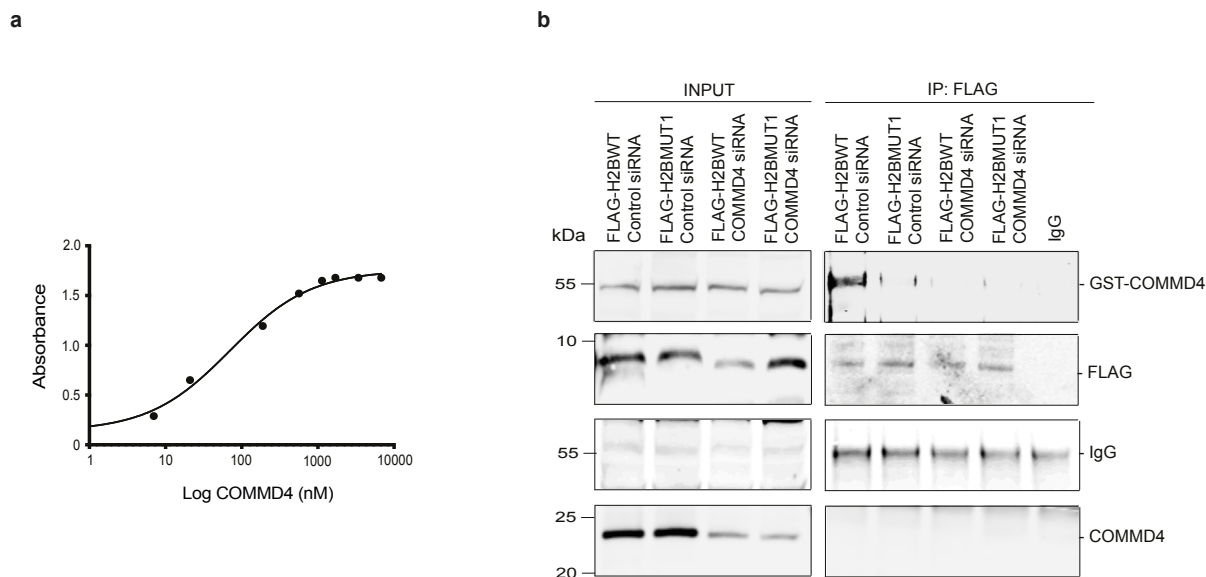

**Fig. S1. Confirming the COMMD4 and H2B binding pose. (a).** An ELISA showing the binding of H2BWTpep and recombinant COMMD4. An EC<sub>50</sub> of 70 nM for COMMD4 is shown. **(b).** The binding of overexpressed FLAG-H2BWT and FLAG-H2BMUT1 with GST-COMMD4 in control and COMMD4 siRNA depleted cells. COMMD4 levels are shown, and IgG heavy chain shows the loading.

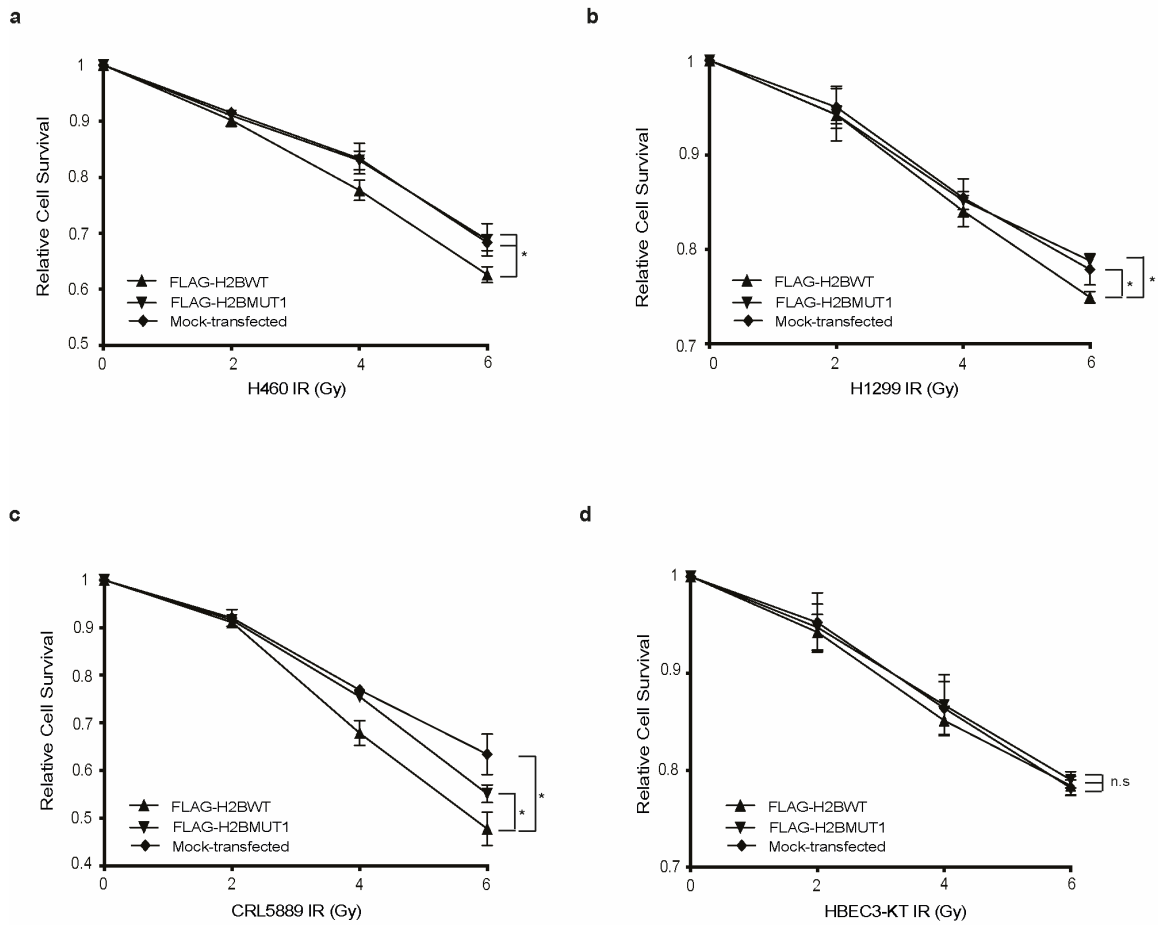

**Fig. S2. Viability of NSCLC cells. (a-d).** Luminescent cell viability assay of H460, H1299 and CRL5889 NSCLC cells and HBEC3-KT cells, transfected with FLAG-H2BWT, FLAG-H2BMUT1 or mock-transfected and treated with varying doses of IR is shown. Asterix (\*) denotes  $P < 0.05$ , n.s; not significant. Error bars represent mean  $\pm$  SD from three independent experiments.

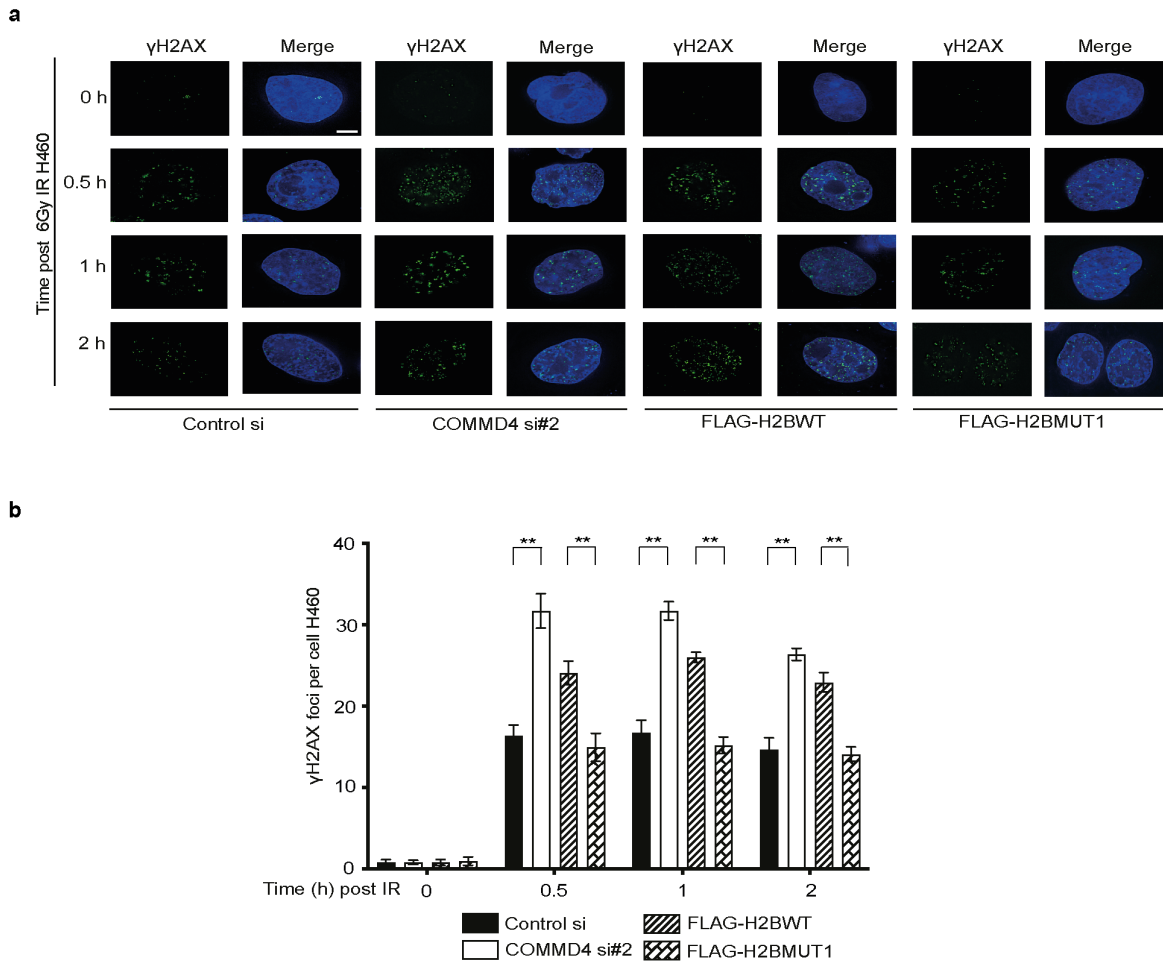

**Fig. S3. Induction of  $\gamma$ H2AX foci in H460 cells. (a).** Immunofluorescence staining of H460 NSCLC cells transfected with control or COMMD4 siRNA #2 and FLAG-H2BWT or FLAG-H2BMUT1, treated with 6 Gy IR followed by recovery at time points shown. **(b).** Plot of  $\gamma$ H2AX foci numbers for **(a)**. \*\*:  $P < 0.005$ . Error bars represent mean  $\pm$  SD from three independent experiments where 50 cells were quantified per condition.  $\gamma$ H2AX is shown in green and DAPI shows the nucleus. Scale bar denotes 5  $\mu$ m.

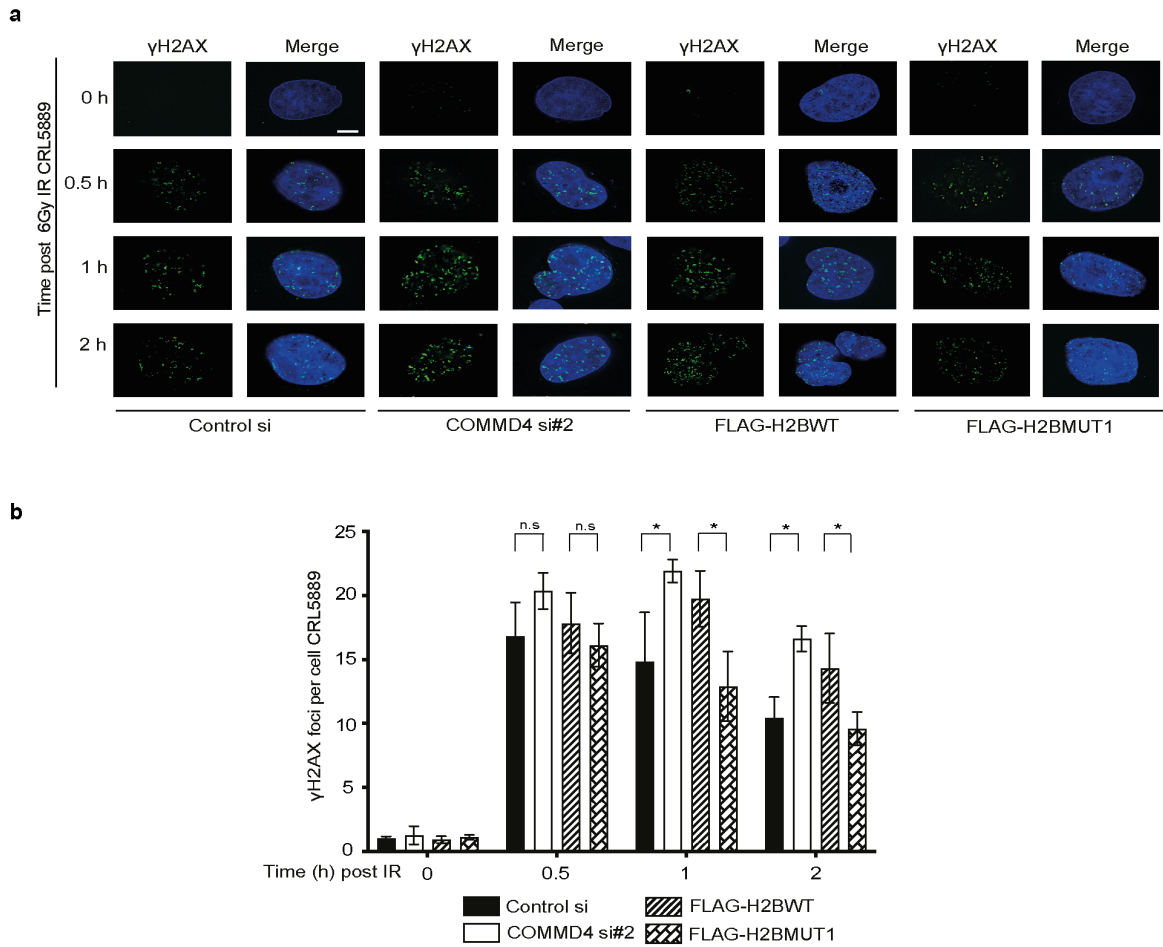

**Fig. S4. Induction of  $\gamma$ H2AX foci in CRL5889 cells. (a).** Immunofluorescence staining of CRL5889 NSCLC cells transfected with control or COMMD4 siRNA #2 and FLAG-H2BWT or FLAG-H2BMUT1, treated with 6 Gy IR followed by recovery at time points shown. **(b).** Plot of  $\gamma$ H2AX foci numbers for **(a)**. n.s.; not significant and \*;  $P < 0.05$ . Error bars represent mean  $\pm$  SD from three independent experiments where 50 cells were quantified per condition.  $\gamma$ H2AX is shown in green and DAPI shows the nucleus. Scale bar denotes 5  $\mu$ m.
