# Supplementary material for: Targeting the COMMD4–H2B protein complex in lung cancer
Source: PubMed Central journal article supplement (PMC10703884; doi:10.1038/s41416-023-02476-8), 2023-11-01

# Original western blot images

Figure 1

e

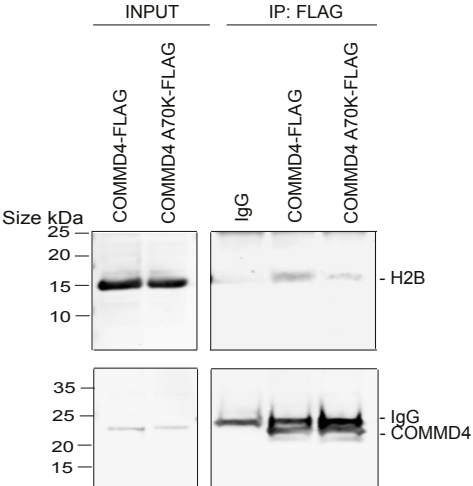

**Figure 2**

**a**

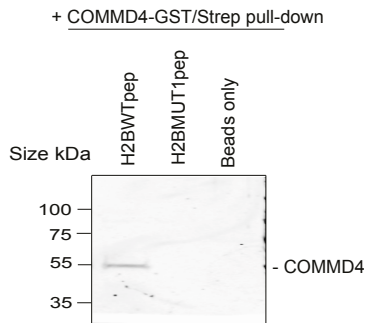

**b**

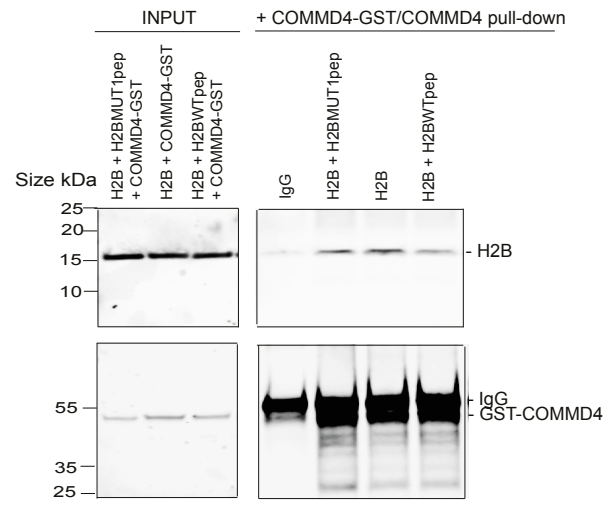

**c**

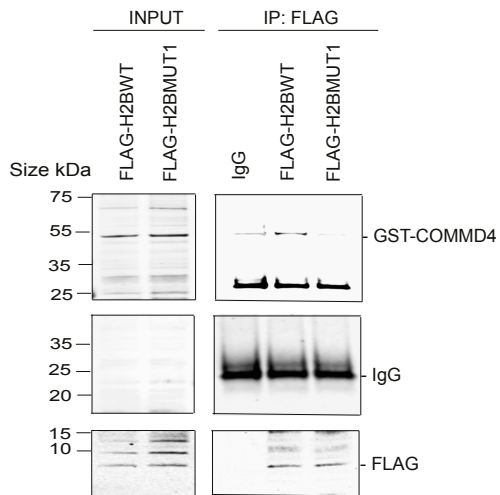

**Figure 3**

**a**

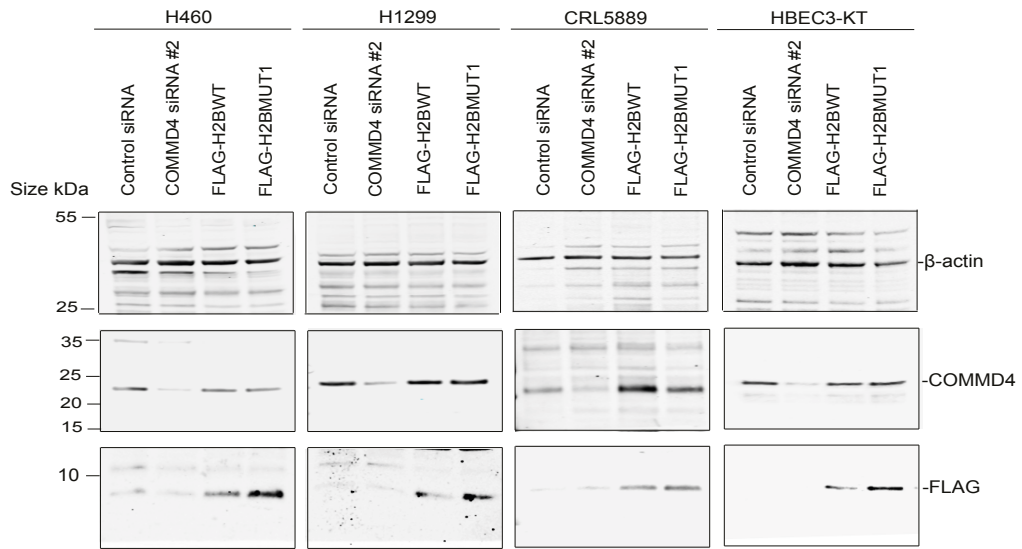

# Supplementary Figure 1

**b**

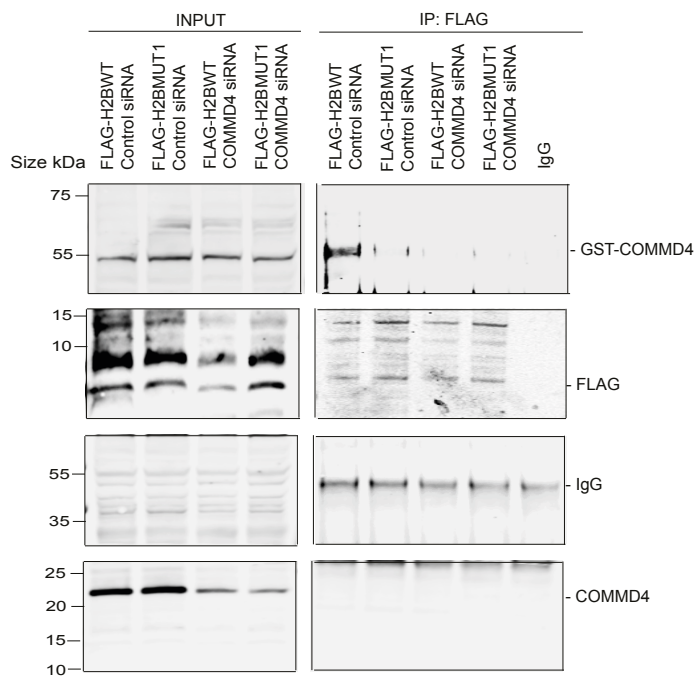

Supplement: 41416_2023_2476_MOESM2_ESM.pdf [file 41416_2023_2476_MOESM2_ESM.pdf]
